# Supplementary material for: Ag-MnxOy on Graphene Oxide Derivatives as Oxygen Reduction Reaction Catalyst in Alkaline Direct Ethanol Fuel Cells
Source: MDPI journal article supplement (doi:10.3390/catal12070780), 2022-07-14
Supplement: s1 [file s1]

## SUPPLEMENTARY MATERIAL

### **Ag-Mn<sub>x</sub>O<sub>y</sub> on Graphene Oxide Derivatives as Oxygen Reduction Reaction Catalyst in Alkaline Direct Ethanol Fuel Cells**

*Sigrid Wolf<sup>fl,\*</sup>, Michaela Roschger<sup>1</sup>, Boštjan Genorio<sup>2</sup>, Mitja Kolar<sup>2</sup>, Daniel Garstenauer<sup>1</sup>, Brigitte Bitschnau<sup>3</sup>, Viktor Hacker<sup>1</sup>*

*<sup>1</sup> Institute of Chemical Engineering and Environmental Technology, Graz University of Technology, Inffeldgasse 25/C, 8010 Graz, Austria*

*<sup>2</sup> Faculty of Chemistry and Chemical Technology, University of Ljubljana, Večna pot 113, 1000 Ljubljana, Slovenia*

*<sup>3</sup> Institute of Physical and Theoretical Chemistry, Graz University of Technology, Stremayrgasse 9, 8010 Graz, Austria*

#### **\* Corresponding author:**

Dipl.-Ing. Sigrid Wolf, BSc.

Graz University of Technology, Institute of Chemical Engineering and  
Environmental Technology

Inffeldgasse 25/C, AUT-8010 Graz, Austria

Tel.: +43316 873 7979

E-mail: sigrid.wolf@tugraz.at

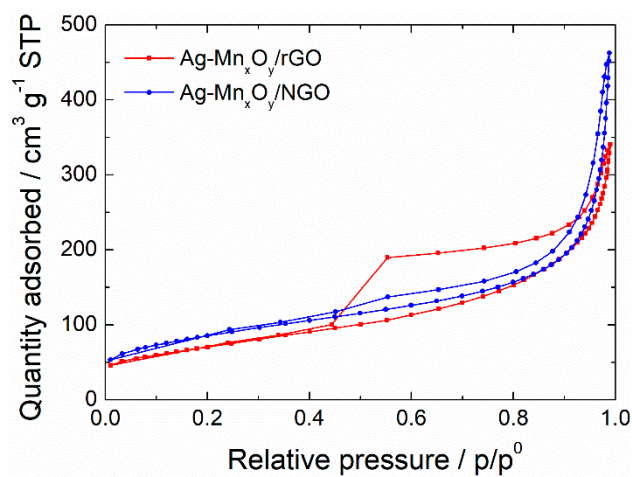

**Figure S1.** Adsorption/desorption isotherms of Ag-Mn<sub>x</sub>O<sub>y</sub>/rGO and Ag-Mn<sub>x</sub>O<sub>y</sub>/NGO.

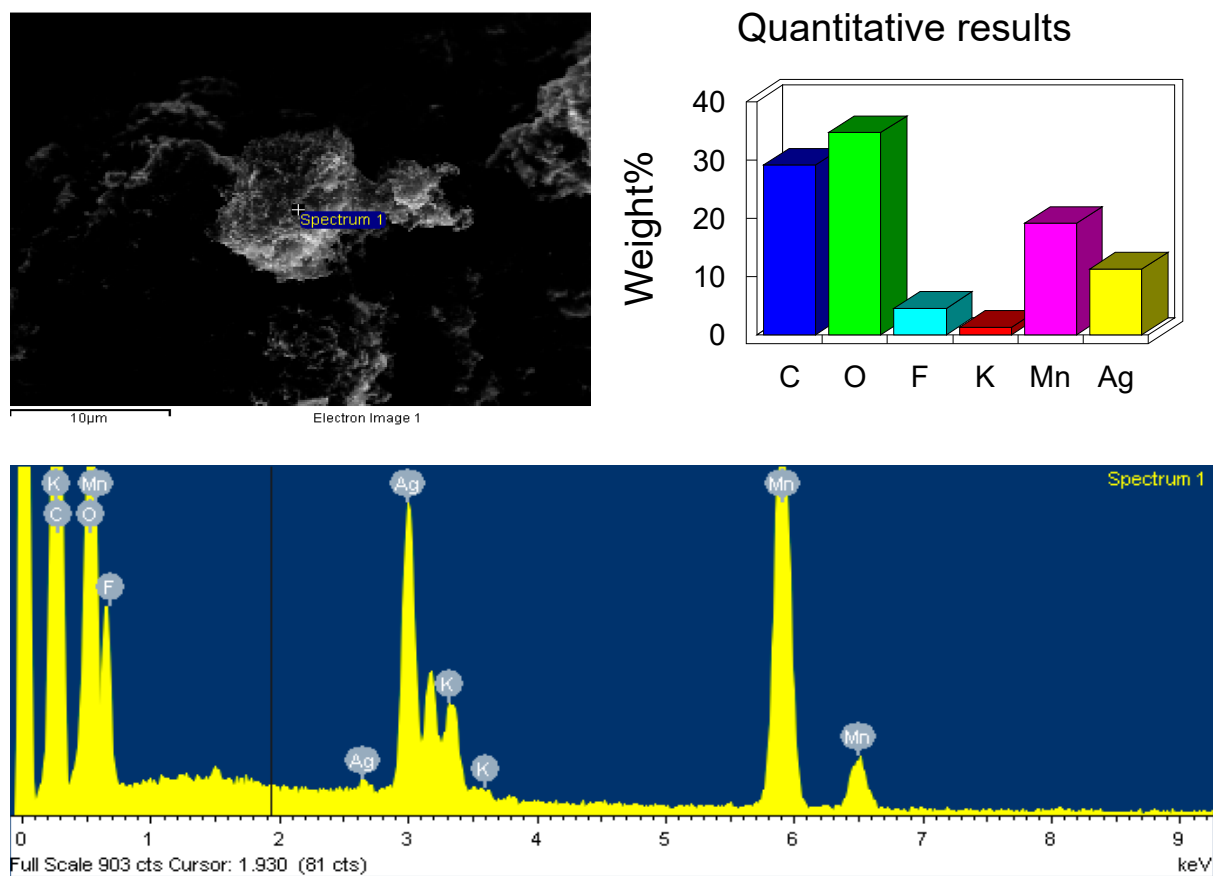

**Figure S2.** EDX results of Ag-Mn<sub>x</sub>O<sub>y</sub>/rGO.

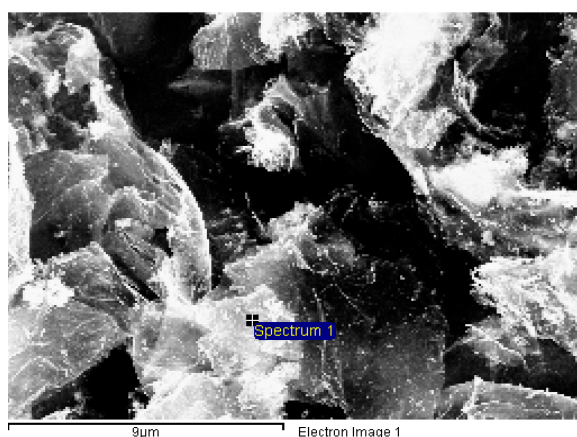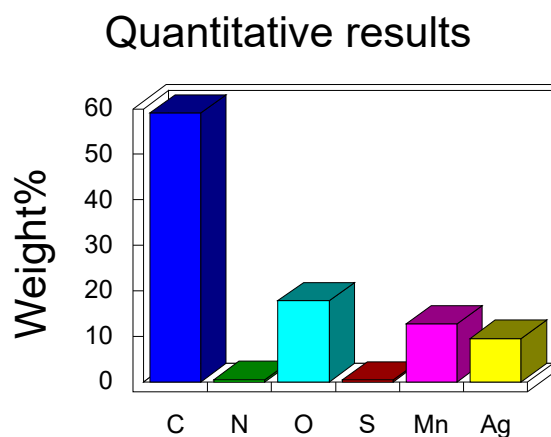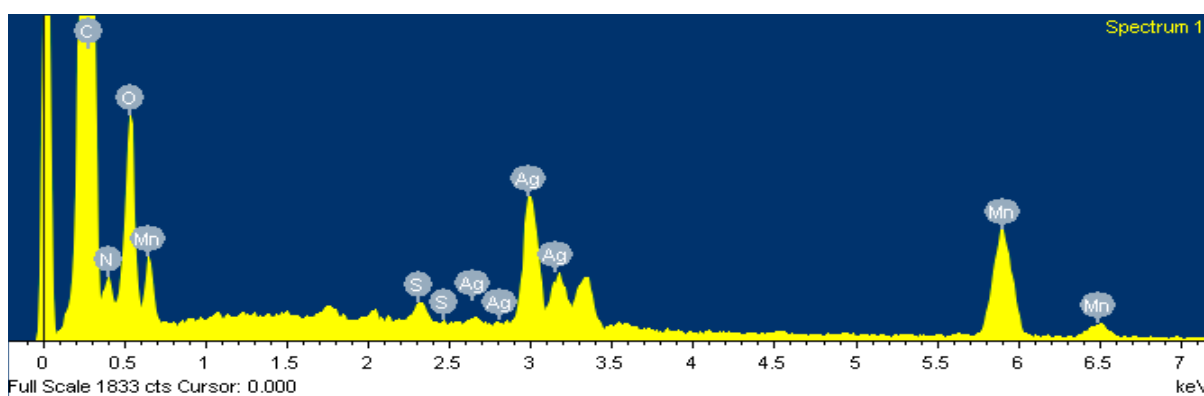

Figure S3. EDX results of Ag-Mn<sub>x</sub>O<sub>y</sub>/NGO.

Table S1. ICP-MS results of the Ag-Mn<sub>x</sub>O<sub>y</sub>/C catalysts.

| Catalysts                              | Mn<br>(wt%) | Ag<br>(wt%) | K<br>(wt%) | Cu<br>(ppm) | Ni<br>(ppm) | Fe<br>(ppm) | Al<br>(ppm) | Cr<br>(ppm) | Ti<br>(ppm) | Co<br>(ppm) | Mg<br>(ppm) |
|----------------------------------------|-------------|-------------|------------|-------------|-------------|-------------|-------------|-------------|-------------|-------------|-------------|
| Ag-Mn <sub>x</sub> O <sub>y</sub> /rGO | 13.81       | 9.51        | 0.89       | 6.70        | <2.4        | <2.4        | 98.4        | <2.4        | <2.4        | <2.4        | 44.9        |
| Ag-Mn <sub>x</sub> O <sub>y</sub> /NGO | 11.64       | 9.05        | 0.40       | 11700       | 11500       | 6600        | 1783        | 1583        | 267         | 261         | 125         |
|                                        | Ca<br>(ppm) | Zn<br>(ppm) | V<br>(ppm) | Mo<br>(ppm) | Ba<br>(ppm) | Se<br>(ppm) | Pb<br>(ppm) | Sr<br>(ppm) | Cd<br>(ppm) | As<br>(ppm) |             |
| Ag-Mn <sub>x</sub> O <sub>y</sub> /rGO | 35.8        | 15.9        | <2.4       | <2.4        | 6.13        | <2.4        | <2.4        | <2.4        | <2.4        | <2.4        |             |
| Ag-Mn <sub>x</sub> O <sub>y</sub> /NGO | 105         | 76.6        | 24.9       | 23.8        | 5.39        | 20.1        | 13.0        | 4.65        | 3.61        | 3.47        |             |

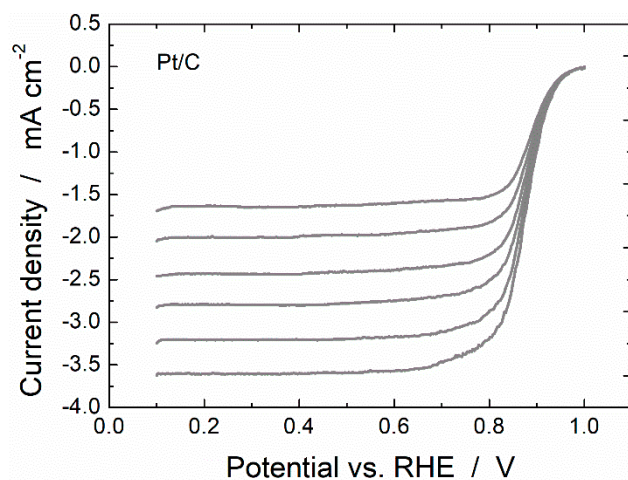

**Figure S4.** Potentiodynamic ORR curves of comm. Pt/C in O<sub>2</sub> saturated 1 M KOH at 10 mV s<sup>-1</sup> at different rotation rates.

**Table S2.** Limiting current density of the graphene derivatives, Ag-Mn<sub>x</sub>O<sub>y</sub>/C composites and Pt/C catalysts without/with EtOH at different rpm.

| Catalysts                              | 400 rpm /<br>mA cm <sup>-2</sup> | 600 rpm /<br>mA cm <sup>-2</sup> | 900 rpm /<br>mA cm <sup>-2</sup> | 1200 rpm /<br>mA cm <sup>-2</sup> | 1600 rpm /<br>mA cm <sup>-2</sup> | 2000 rpm /<br>mA cm <sup>-2</sup> |
|----------------------------------------|----------------------------------|----------------------------------|----------------------------------|-----------------------------------|-----------------------------------|-----------------------------------|
| rGO                                    | -1.05/ -1.02                     | -1.24/ -1.21                     | -1.49/ -1.45                     | -1.70/ -1.65                      | -1.96/ -1.88                      | -2.17/ -2.05                      |
| NGO                                    | -0.99/ -0.91                     | -1.17/ -1.09                     | -1.42/ -1.30                     | -1.60/ -1.48                      | -1.84/ -1.69                      | -2.06/ -1.87                      |
| Ag-Mn <sub>x</sub> O <sub>y</sub> /rGO | -1.56/ -1.43                     | -1.88/ -1.71                     | -2.28/ -2.07                     | -2.63/ -2.37                      | -3.01/ -2.72                      | -3.41/ -3.04                      |
| Ag-Mn <sub>x</sub> O <sub>y</sub> /NGO | -1.51/ -1.35                     | -1.80/ -1.62                     | -2.18/ -1.94                     | -2.49/ -2.21                      | -2.85/ -2.52                      | -3.18/ -2.80                      |

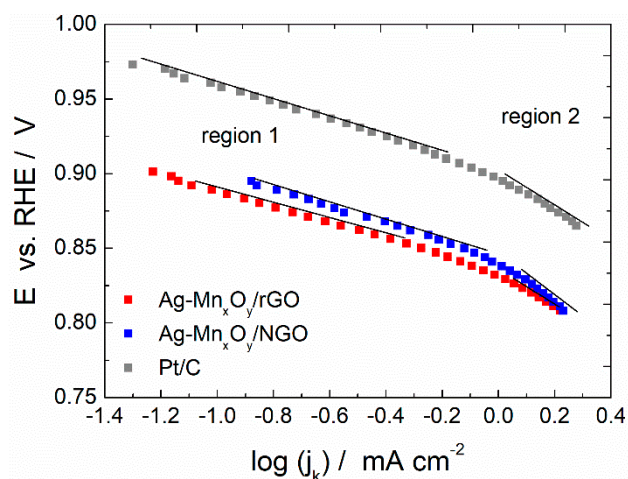

**Figure S5.** Tafel Plot of Ag-Mn<sub>x</sub>O<sub>y</sub>/C composites and Pt/C derived from the ORR curves in O<sub>2</sub> saturated 1 M KOH at 10 mV s<sup>-1</sup> at different rotation rates.

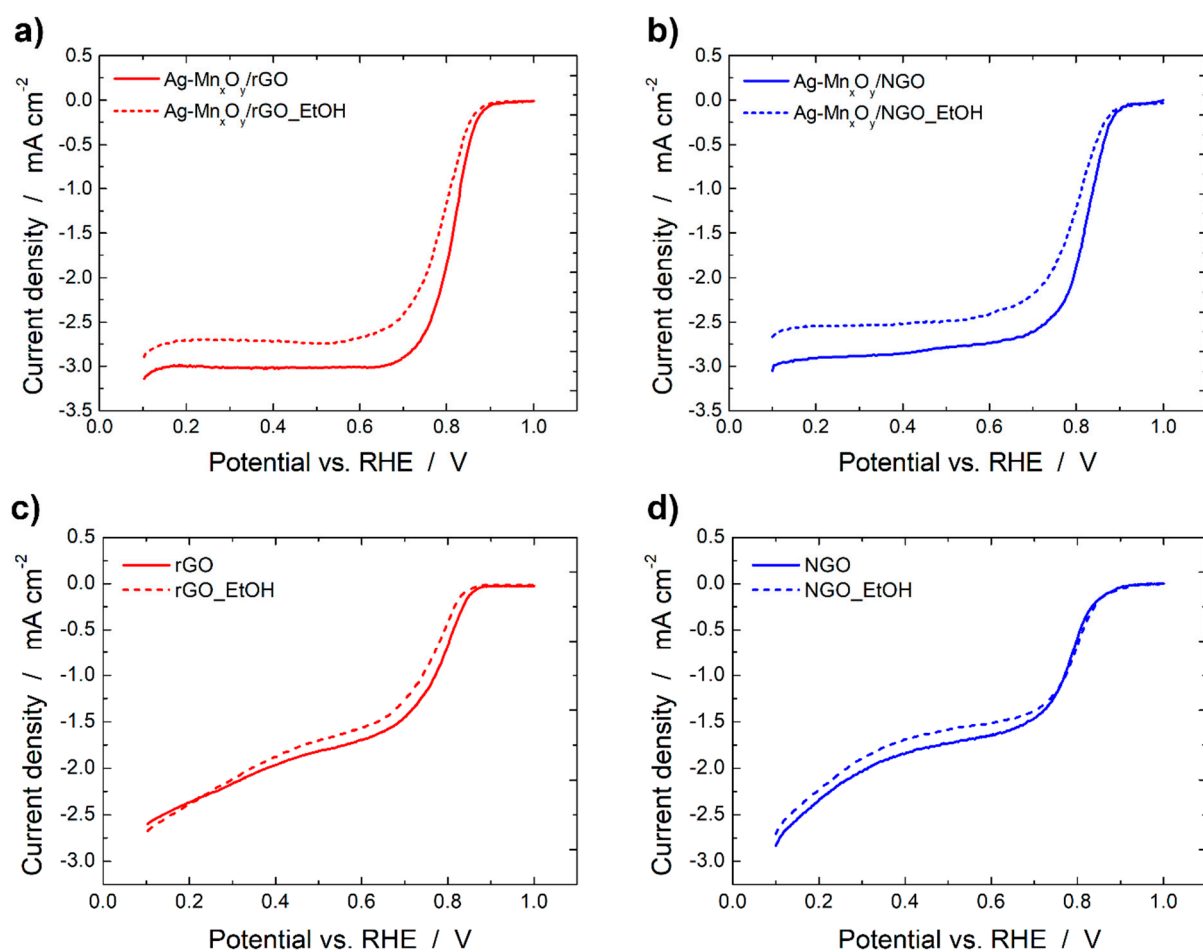

**Figure S6.** Potentiodynamic ORR curves of Ag-Mn<sub>x</sub>O<sub>y</sub>/rGO (a) and Ag-Mn<sub>x</sub>O<sub>y</sub>/NGO (b) catalysts and blank support materials (c, d) in O<sub>2</sub> saturated 1 M KOH at 10 mV s<sup>-1</sup> at 1600 rpm with and without EtOH.
